# Supplementary material for: Controlling Site‐Directed RNA Editing by Chemically Induced Dimerization
Source: PubMed Central journal article supplement — Chemistry. 2021 Jul 26;27(48):12300–4. doi: 10.1002/chem.202101985 (PMC8456898; doi:10.1002/chem.202101985), 2021-07-26
Supplement: CHEM-27-12300-s001.pdf [file CHEM-27-12300-s001.pdf]

# Chemistry–A European Journal

Supporting Information

## **Controlling Site-Directed RNA Editing by Chemically Induced Dimerization**

Anna S. Stroppel, Ruth Lappalainen, and Thorsten Stafforst\*

## Contents

|                                                                                                 |   |
|-------------------------------------------------------------------------------------------------|---|
| Cloning of editase constructs <b>I – IV</b>                                                     | 2 |
| General cultivation & generation of stable cell lines                                           | 2 |
| Western Blotting                                                                                | 2 |
| Preparation of lysates from wildtype 293T cells transiently expressing constructs <b>I – IV</b> | 2 |
| Preparation of lysates from 293 Flp-In™ T-REx™ cell lines <b>3 &amp; 4</b>                      | 2 |
| PAGE & Western Blot                                                                             | 3 |
| Generation of guideRNAs                                                                         | 4 |
| Editing experiments                                                                             | 5 |
| Editing of endogenous GAPDH under genomic expression of editase constructs                      | 5 |
| Determination of dose-response to GA <sub>3</sub> -AM                                           | 5 |
| Editing of endogenous STAT1 under genomic expression of editase constructs                      | 5 |
| Editing of endogenous STAT1 under transient expression of editase constructs                    | 6 |
| Editing of transfected MECP2 under transient expression of editase constructs                   | 6 |
| Supporting literature                                                                           | 6 |
| Appendix                                                                                        | 7 |
| Constructs <b>I – IV</b>                                                                        | 7 |

## List of Figures

|           |   |
|-----------|---|
| Figure S1 | 3 |
| Figure S2 | 4 |

## List of Tables

|          |   |
|----------|---|
| Table S1 | 4 |
|----------|---|

## Cloning of editase constructs I – IV

Constructs **I – IV** for co-expression of GAL<sub>1-92</sub>-ADAR1(Q) and SNAP<sub>F</sub>-GID1A were cloned in a pcDNA 5 vector via restriction/ligation. ADAR1(Q) and SNAP<sub>F</sub> were amplified from our own plasmids, GAL<sub>1-92</sub> and GID1A coding sequences were kindly provided by Dr. R. Wombacher, Ruprecht Karls University, Heidelberg, Germany.<sup>[1]</sup> GAL<sub>1-92</sub>-ADAR1(Q) and SNAP<sub>F</sub>-GID1A were then successively ligated into one common pcDNA 5 vector. Constructs **I** and **III** were generated by ligation into a vector with two consecutive CMV enhancers and CMV promoters, each followed by two copies of the *tet* operator (TetO<sub>2</sub>) via BamHI/Ascl/ApaI and NotI/NheI/ClaI. Constructs **II** and **IV** were generated by ligation into a vector with one CMV enhancer and CMV promoter, followed by two copies of the *tet* operator (TetO<sub>2</sub>) and a central self-cleaving P2A via BamHI/Ascl/NotI and XhoI/NheI/PacI. The sequences of the respective constructs are attached as Appendix.

## General cultivation & generation of stable cell lines

In general, cells were cultivated in Dulbecco's Modified Eagle Medium (DMEM, LIFE TECHNOLOGIES) supplemented with 10 % fetal bovine serum (FBS, LIFE TECHNOLOGIES) and 100 U/ml penicillin-streptomycin (LIFE TECHNOLOGIES), short DMEM/FBS/P/S, at 37 °C with 5 % CO<sub>2</sub> in a water saturated steam atmosphere. Stable, inducible cell lines **1 – 4** with integrated constructs **I – IV** respectively were generated with the Flp-In™ T-REx™ system by LIFE TECHNOLOGIES. 4·10<sup>6</sup> 293 Flp-In™ T-REx™ cells were seeded in 10 ml DMEM/10 % FBS/100 µg/ml zeocin/15 µg/ml blasticidin (DMEM/FBS/Z/B) in a 10 cm dish. After 23 h, medium was replaced with DMEM/10 % FBS (DMEM/FBS) and 1 h later 9 µg pOG 44 and 1 µg of the respective construct in a pcDNA 5 vector were forward transfected with 30 µl Lipofectamine 2000 (THERMO FISHER SCIENTIFIC). After 24 h, medium was replaced with 15 ml DMEM/FBS/15 µg/ml blasticidin/100 µg/ml hygromycin (DMEM/FBS/B/H), followed by selection for approximately two weeks. Then, the stable cell lines were transferred to a 75 cm<sup>2</sup> cell culture flask and subsequently cultivated in DMEM/FBS/B/H.

## Western Blotting

### Preparation of lysates from wildtype 293T cells transiently expressing constructs I – IV

2·10<sup>5</sup> wildtype 293T cells were seeded in 500 µl DMEM/FBS/P/S in 3 wells of a 24 well plate per condition. After 24 h, medium was replaced with 450 µl DMEM/FBS and 300 ng of constructs **I – IV** in pcDNA 5 respectively were forward transfected with 1.2 µl Lipofectamine 2000 (LIFE TECHNOLOGIES). 24 h thereafter, medium was removed and cells were first washed with 500 µl PBS and then detached and suspended in 500 µl fresh PBS per well. Cells from one condition were combined and then centrifuged for 5 min at 1.600 rpm, followed by removal of PBS and resuspension of the cell pellets in 75 µl urea lysis buffer (8 M urea, 100 mM NaH<sub>2</sub>PO<sub>4</sub>, 10 mM Tris, pH 8.0). Cells were then lysed via shear force by drawing the solution 15× up and out a 19 gauge syringe. After centrifugation for 15 min at 16.000 rpm and 4 °C, the supernatant lysates were transferred to fresh reaction tubes.

### Preparation of lysates from 293 Flp-In™ T-REx™ cell lines 3 & 4

Lysates from stable, inducible cell lines **3** and **4** expressing the hyperactive ADAR1Q were also analyzed via Western Blot. For comparison, our previously established SNAP-ADAR1Q 293 Flp-In™ T-REx™ cell line (SA1Q)<sup>[2]</sup> was examined in parallel. 1·10<sup>6</sup> 293 Flp-In™ T-REx™ cells from the respective cell line were seeded in 2500 µl medium in one well of a 6 well plate per condition. For the uninduced samples (– Dox) DMEM/FBS/B/H was used as medium, for the samples with doxycycline induction (+ Dox)

DMEM/FBS/B/H/ 10 ng/ml doxycycline (DMEM/FBS/B/H/D) was used. After 24 h, medium was removed and cells were first washed with 1000  $\mu$ l PBS and then detached and suspended in 1000  $\mu$ l fresh PBS. Centrifugation for 5 min at 1.600 rpm was followed by removal of PBS and resuspension of the cell pellets in 75  $\mu$ l urea lysis buffer (8 M urea, 100 mM NaH<sub>2</sub>PO<sub>4</sub>, 10 mM Tris, pH 8.0). Cells were then again lysed via shear force by drawing the solution 15 $\times$  up and out a 19-gauge syringe. After centrifugation for 15 min at 16.000 rpm and 4  $^{\circ}$ C, the supernatant lysates were transferred to fresh reaction tubes.

### PAGE & Western Blot

Total protein concentrations of all samples were determined via Bradford assay (SIGMA ALDRICH B6916) and equal amounts of proteins in 16.66  $\mu$ l urea lysis buffer were heated with 3.33  $\mu$ l 6 $\times$  Laemmli buffer (0.4 M SDS, 60 mM Tris pH 6.8, 6.5 M glycerol, 0.6 M dithiothreitol, 0.9 mM bromophenol blue) for 5 min at 95  $^{\circ}$ C and 700 rpm. Subsequently, samples and PageRuler™ Plus protein ladder (THERMO FISHER 26620) were loaded to a Novex™ WedgeWell™ 8–16 % Tris-Glycine gel (THERMO FISHER XP08165BOX), which was run at 90 V for 5 min followed by 160 V for 90 min. Proteins were transferred onto a PVDF membrane (BIO-RAD LABORATORIES) at 30 V and 4  $^{\circ}$ C for 18 h, followed by blocking in 5 % dry milk in TBST for 1 h. For characterization of GAI<sub>1-92</sub>-ADAR1(Q) expression, the respective blot was incubated with rabbit  $\alpha$ -ADAR1 (1:1.000, BETHYL LABORATORIES A303-884A) in 5 % DryMilk-TBST at 4  $^{\circ}$ C overnight as primary antibody. For characterization of SNAP-GID1A expression, the respective blot was incubated with rabbit  $\alpha$ -SNAP-tag (1:1.000, NEW ENGLAND BIOLABS P9310S) in 5 % DryMilk-TBST at room temperature for 2 h. In both cases, this was followed by incubation with goat  $\alpha$ -rabbit HRP (1:5.000, JACKSON IMMUNORESEARCH 111-035-003) for 2 h at room temperature as secondary antibody. Chemiluminescence was measured with a FUSION FX by VILBER. As loading control,  $\alpha$ -GAPDH (1:3.333, THERMO FISHER AM4300) in 5 % DryMilk-TBST was applied at 4  $^{\circ}$ C overnight, followed by goat  $\alpha$ -mouse HRP (1:5.000, JACKSON IMMUNORESEARCH 115-035-003) in 5 % DryMilk-TBST for 2 h at room temperature. Chemiluminescence was again measured with a FUSION FX by VILBER.

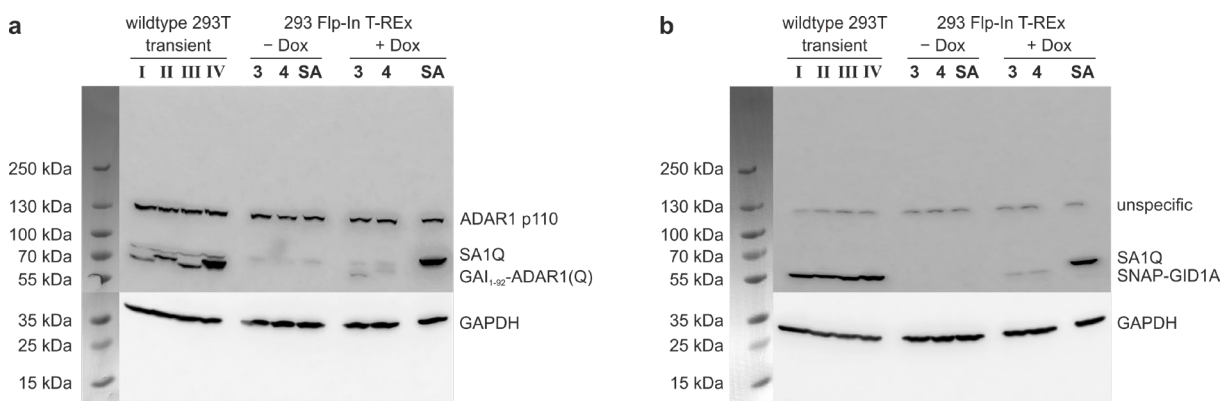

**Figure S1.** Full Western Blots (corresponding to sections shown in Figure 2b,c) of wildtype 293T cells transiently transfected with constructs **I–IV**, as well as GAI<sub>1-92</sub>-ADAR1Q/SNAP-GID1A 293 Flp-In T-REx cell lines **3** and **4** without (– Dox) and with 24 h (+ Dox) doxycycline induction. SA1Q 293 Flp-In T-REx cell line (**SA**) shown for comparison. **a)** Detection of the different ADAR1 proteins with  $\alpha$ -ADAR1. GAI<sub>1-92</sub>-ADAR1(Q) from constructs **II** and **IV** is of slightly larger size due to the residual P2A peptide. An additional band originating from endogenous ADAR1 p110 can be observed equally for all samples. **b)** Detection of different SNAP proteins with  $\alpha$ -SNAP-tag. Blots were cut above the GAPDH loading control before detection.

## Generation of guideRNAs

NH<sub>2</sub>-guideRNAs were purchased from BIOSPRING in ion exchange HPLC-purified quality. guideRNAs were 22 to 25 nt long, containing a 5'-C6-aminolinker, and were chemically stabilized similar as described before.<sup>[3]</sup> Table S1 provides the sequences, modification patterns and extinction coefficients at 260 nm of all guideRNAs. The snap-GAPDH guideRNA was generated from the NH<sub>2</sub>-GAPDH guideRNA by a post-synthesis labeling protocol analogous to a previously published protocol,<sup>[4]</sup> by applying snap (35 eq). (snap)<sub>2</sub>-STAT1 and (snap)<sub>2</sub>-MECP2 were produced analogous to the previously reported improved protocol with DIC activation,<sup>[5]</sup> using (snap)<sub>2</sub> (17.5 eq).

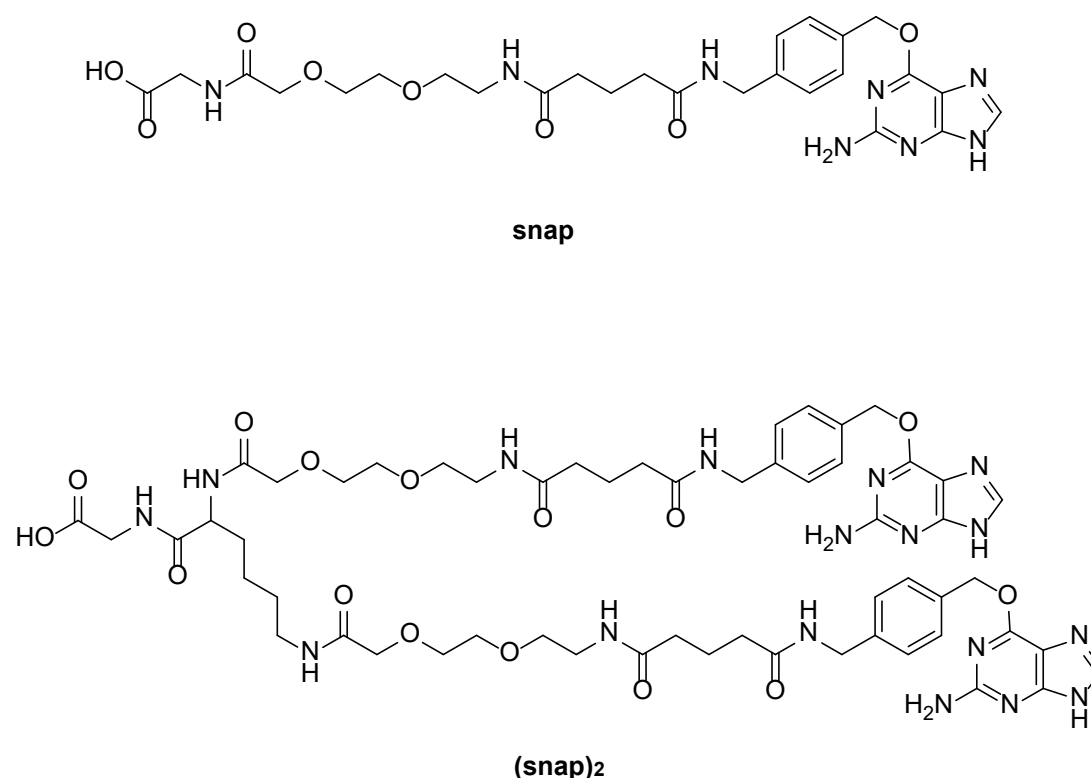

Figure S2. Structures of snap and (snap)<sub>2</sub>, which were pre-activated at their carboxylic acids and coupled to the 5'-C6-aminolinker of NH<sub>2</sub>-guideRNA.

Table S1. Sequences and  $\epsilon_{260\text{ nm}}$  of used guideRNAs. Normal uppercase = ribonucleotide, *italics* = 2'OMe, **bold** = LNA, *s* = phosphorothioate linkage.

| guideRNA                   | Target       | Sequence                          | $\epsilon_{260\text{ nm}} / \text{mm}^1\text{cm}^{-1}$ |
|----------------------------|--------------|-----------------------------------|--------------------------------------------------------|
| NH <sub>2</sub> -GAPDH     | GAPDH 3'-UTR | AsAsUAAGGGGU CCA CAUGGsCsAsAsC    | 232.00                                                 |
| snap-GAPDH                 | GAPDH 3'-UTR | AsAsUAAGGGGU CCA CAUGGsCsAsAsC    | 234.50                                                 |
| NH <sub>2</sub> -STAT1     | STAT1 Y701C  | AsGsUGUCUUGAU ACA UCCAGUUsCsCsUsT | 246.50                                                 |
| (snap) <sub>2</sub> -STAT1 | STAT1 Y701C  | AsGsUGUCUUGAU ACA UCCAGUUsCsCsUsT | 251.50                                                 |
| NH <sub>2</sub> -MECP2     | MECP2 R106Q  | AsCsATUAAGCUU UCG UGUCCAAsCsCsUsT | 245.65                                                 |
| (snap) <sub>2</sub> -MECP2 | MECP2 R106Q  | AsCsATUAAGCUU UCG UGUCCAAsCsCsUsT | 250.65                                                 |

## Editing experiments

All editing experiments depicted in bar graphs were conducted in biological triplicates and standard deviations are shown.

### Editing of endogenous GAPDH under genomic expression of editase constructs

$4 \cdot 10^5$  of the respective 293 Flp-In™ T-REx™ cells were seeded in 500  $\mu$ l DMEM/FBS/B/H/D in a 24 well plate. After 24 h,  $8 \cdot 10^4$  cells were reverse transfected in a 96 well plate with 5.0 pmol of the respective guideRNA with 0.5  $\mu$ l Lipofectamine 2000 and 10  $\mu$ M GA<sub>3</sub>-AM (from a 10 mM stock in DMSO) were added to the medium of the indicated samples. Doxycycline concentration was kept at 10 ng/ml and after further 24 h cells were harvested. RNA isolation was performed with the Monarch® RNA cleanup kit from NEW ENGLAND BIOLABS, followed by DNase I digestion. Purified RNA was then reverse transcribed and amplified with the One Step RT-PCR Kit from BIOTECHRABBIT and subsequently analyzed with Sanger sequencing (MICROSYNTH). A-to-I editing yields were determined by dividing the peak height for guanosine by the sum of the peak heights for both adenosine and guanosine.

### Determination of dose-response to GA<sub>3</sub>-AM

To determine the dose-response to GA<sub>3</sub>-AM, editing experiments were performed in 293 Flp-In™ T-REx™ cells from cell line **4** as described for the editing of endogenous GAPDH. 0.01, 0.03, 0.1, 0.3, 1, 3, 10, 30, 60 or 100  $\mu$ M GA<sub>3</sub>-AM were applied from the respective 1000 $\times$  stocks in DMSO. As negative controls, cells were treated with NH<sub>2</sub>-GAPDH without GA<sub>3</sub>-AM, NH<sub>2</sub>-GAPDH + 100  $\mu$ M GA<sub>3</sub>-AM and snap-GAPDH without GA<sub>3</sub>-AM, none of which showed substantial editing.

The experiment was conducted in biological triplicates and the mean editing yields after treatment with snap-GAPDH and the respective concentration of GA<sub>3</sub>-AM were plotted on a logarithmic scale against the concentration of GA<sub>3</sub>-AM. The following logistic dose response curve was fitted to the data:

$$\text{editing } e / \% = \frac{e_{min} - e_{max}}{1 + \left(\frac{x}{x_0}\right)^p} + e_{max}$$

with  $e_{min} = 1.5$  %: minimal editing,  $e_{max} = 31$  %: maximal editing,  $x$ : c(GA<sub>3</sub>-AM),  $x_0 = 0.29$ : center,  $p = 0.56$ : power and corrected  $R^2 = 0.9945$ . The resulting half maximal effective concentration of GA<sub>3</sub>-AM is  $EC_{50} \approx 290$  nM.

### Editing of endogenous STAT1 under genomic expression of editase constructs

$4 \cdot 10^5$  of the respective 293 Flp-In™ T-REx™ cells were seeded in 500  $\mu$ l DMEM/FBS/B/H/D in a 24 well plate. After 24 h,  $8 \cdot 10^4$  cells were reverse transfected in a 96 well plate with 5.0 pmol of the respective guideRNA with 0.5  $\mu$ l Lipofectamine 2000 and 100  $\mu$ M GA<sub>3</sub>-AM (from a 100 mM stock in DMSO) were added to the medium of the indicated samples. Doxycycline concentration was kept at 10 ng/ml and after further 24 h cells were harvested. RNA isolation was performed with the Monarch® RNA cleanup kit from NEW ENGLAND BIOLABS. Purified RNA was then treated with a DNA oligonucleotide of complementary sequence to the STAT1 guideRNA (5'-aaggaaactggatctatcaagacacc, 1  $\mu$ M) at 95 °C for 1 min to trap the guideRNA, followed by reverse transcription and amplification with the One Step RT-PCR Kit from BIOTECHRABBIT. A-to-I editing yields were again determined by Sanger sequencing (MICROSYNTH) by dividing the peak height for guanosine by the sum of the peak heights for both adenosine and guanosine.

### Editing of endogenous STAT1 under transient expression of editase constructs

2·10<sup>5</sup> wildtype 293T cells were seeded in 500 µl DMEM/FBS/P/S in a 24 well plate. After 24 h, medium was replaced with 450 µl DMEM/FBS and 300 ng of either construct **I**, **II**, **III** or **IV** in pcDNA 5 were forward transfected with 1.2 µl Lipofectamine 2000. After further 24 h, 8·10<sup>4</sup> cells were reverse transfected in a 96 well plate with the respective amount of the indicated guideRNA with 0.5 µl Lipofectamine 2000 and 10 µM or 100 µM GA<sub>3</sub>-AM (from a 10 mM or 100 mM stock in DMSO) were added to the medium as indicated. Doxycycline concentration was kept at 10 ng/ml and after further 24 h cells were harvested and proceeded as for the editing of STAT1 under genomic expression of the editase constructs.

### Editing of transfected MECP2 under transient expression of editase constructs

2·10<sup>5</sup> wildtype 293T cells were seeded in 500 µl DMEM/FBS/P/S in a 24 well plate. After 24 h, medium was replaced with 450 µl DMEM/FBS and 300 ng mMECP2 R106Q in pEGFP-N3 (kindly provided by Dr. G. Mandel, Oregon Health and Science University, Portland, USA)<sup>[6]</sup> together with 300 ng of either construct **III**, **IV** or SNAP-ADAR1Q in pcDNA 5 were forward transfected with 2.4 µl Lipofectamine 2000. After further 24 h, 8·10<sup>4</sup> cells were reverse transfected in a 96 well plate with 1.0 pmol of the indicated guideRNA with 0.5 µl Lipofectamine 2000 and 10 µM or 100 µM GA<sub>3</sub>-AM (from a 10 mM or 100 mM stock in DMSO) were added to the medium as indicated. Doxycycline concentration was kept at 10 ng/ml and after further 24 h cells were harvested and proceeded as for the editing of GAPDH.

## Supporting literature

- [1] K. M. Schelkle, T. Griesbaum, D. Ollech, S. Becht, T. Buckup, M. Hamburger, R. Wombacher, *Angew. Chem. Int. Ed.* **2015**, *54*, 2825–2829; *Angew. Chem.* **2015**, *127*, 2867–2871.
- [2] P. Vogel, M. Moschref, Q. Li, T. Merkle, K. D. Selvasarayanan, J. B. Li, T. Stafforst, *Nat. Methods* **2018**, *15*, 535–538.
- [3] P. Vogel, T. Stafforst, *ChemMedChem* **2014**, *9*, 2021–2025.
- [4] A. Hanswillemenke, T. Kuzdere, P. Vogel, G. Jékely, T. Stafforst, *J. Am. Chem. Soc.* **2015**, *137*, 15875–15881.
- [5] A. Hanswillemenke, T. Stafforst, *Methods Enzymol.* **2019**, *624*, 47–68.
- [6] J. R. Sinnamon, S. Y. Kim, G. M. Corson, Z. Song, H. Nakai, J. P. Adelman, G. Mandel, *Proc. Natl. Acad. Sci. U. S. A.* **2017**, *114*, E9395–E9402.

## Appendix

### Constructs I – IV

**Construct I:** CMV-enhancer – CMV promoter – TetO<sub>2</sub> – GAI<sub>1-92</sub> – ADAR1 – bGH – CMV-enhancer – CMV promoter – TetO<sub>2</sub> – SNAP<sub>F</sub>-tag – GID1A – bGH

GACATTGATTATTGACTAGTTATTAATAGTAATCAATTACGGGGTCATTAGTTCATAGCCCATATATG  
GAGTTCGCGTTACATAACTTACGGTAAATGGCCCGCTGGCTGACCGCCCAACGACCCCCGCCATT  
GACGTCAATAATGACGTATGTTCCCATAGTAACGCCAATAGGGACTTTCCATTGACGTCAATGGGTGG  
AGTATTTACGGTAAACTGCCCACTTGGCAGTACATCAAGTGTATCATATGCCAAGTACGCCCCCTATT  
GACGTCAATGACGGTAAATGGCCCGCTGGCATTATGCCCAGTACATGACCTTATGGGACTTTCCTAC  
TTGGCAGTACATCTACGTATTAGTCATCGCTATTACCATGGTGATGCGGTTTTGGCAGTACATCAATG  
GGCGTGGATAGCGGTTTACTCACGGGGATTTCCAAGTCTCCACCCCATTGACGTCAATGGGAGTTTG  
TTTTGGCACCAAAATCAACGGGACTTTCAAAAATGTCGTAACAACCTCCGCCCCATTGACGCAAATGGG  
CGGTAGGCGTGTACGGTGGGAGGTCTATATAAGCAGAGCTCTCCCTATCAGTGATAGAGATCTCCCTA  
TCAGTGATAGAGATCGTCGACGAGCTCGTTTTAGTGAACCGTCAGATCGCCTGGAGACGCCATCCACGC  
TGTTTTGACCTCCATAGAAGACACCGGGACCGATCCAGCCTCCGGACTCTAGCGTTTAACTTAAGCT  
TGGTACCGAGCTCGGATCCCCACCATGAAGAGAGATCATCATCATCATCAAGATAAGAAGAC  
TATGATGATGAATGAAGAAGACGACGGTAACGGCATGGATGAGCTTCTAGCTGTTCTTGTTACAAGG  
TTAGGTCATCCGAAATGGCTGATGTTGCTCAGAACTTGAGCAGCTTGAAGTTATGATGTCTAATGTT  
CAAGAAGACGATCTTCTCAACTCGTACTGAGACTGTTCACTATAATCCGGCGGAGCTTTACACGTG  
GCTTGATTCTATGCTCACCGACCTTAATCCTGCAGGCGGAGGCGCGCCAGGGTCTGGCGGCGGCAGTA  
AGGCAGAACGCATGGGTTTTACAGAGGTAACCCAGTGACAGGGGCCAGTCTCAGAAGAACTATGCTC  
CTCCTCTCAAGGTCCCAGAAGCACAGCCAAAGACACTCCCTCTCACTGGCAGCACCTTCCATGACCA  
GATAGCCATGCTGAGCCACCGGTGCTTCAACACTCTGACTAACAGCTTCCAGCCCTCCTTGCTCGGCC  
GCAAGATTCTGGCCGCCATCATTATGAAAAAAGACTCTGAGGACATGGGTGTCGTCGTCAGCTTGGGA  
ACAGGGAATCGCTGTGTAAGGAGATTCTCTCAGCCTAAAAGGAGAACTGTCAATGACTGCCATGC  
AGAAATAATCTCCCGGAGAGGCTTCATCAGGTTTTCTCTACAGTGAGTTAATGAAATACAACCTCCCAGA  
CTGCGAAGGATAGTATATTTGAACCTGCTAAGGGAGGAGAAAAGCTCCAAATAAAAAAGACTGTGTCA  
TTCCATCTGTATATCAGCACTGCTCCGTGTGGAGATGGCGCCCTCTTTGACAAGTCTGCAGCGACCG  
TGCTATGGAAAGCACAGAATCCCGCCACTACCTGTCTTCGAGAATCCCAAACAAGGAAAGCTCCGCA  
CCAAGTGGAGAACGGAGAAGGCACAATCCCTGTGGAATCCAGTGACATTGTGCCTACGTGGGATGGC  
ATTCGGCTCGGGGAGAGACTCCGTACCATGTCTGTAGTGACAAAATCCTACGCTGGAACGTGCTGGG  
CCTGCAAGGGGCACTGTTGACCCACTTCTGCAGCCATTTATCTCAAATCTGTCACATTGGGTTACC  
TTTTCAGCCAAGGGCATCTGACCCGTGCTATTTGCTGTGTCGTGACAAGAGATGGGAGTGCATTTGAG  
GATGGACTACGACATCCCTTTATTGTCAACCACCCCAAGGTTGGCAGAGTCAGCATATATGATTCCAA  
AAGGCAATCCGGGAAGACTAAGGAGACAAGCGTCAACTGGTGTCTGGCTGATGGCTATGACCTGGAGA  
TCCTGGACGGTACCAGAGGCACTGTGGATGGGCCACGGAATGAATTGTCCCGGTCTCCAAAAAGAAC  
ATTTTTCTTCTATTTAAGAAGCTCTGCTCCTTCCGTTACCGCAGGGATCTACTGAGACTCTCCTATGG  
TGAGGCCAAGAAAGCTGCCCGTACTACGAGACGGCCAAGAACTACTTCAAAAAAGGCCTGAAGGATA  
TGGGCTATGGGAAGTGGATTAGCAAACCCAGGAGGAAAAGAACTTTTATCTCTGCCCAGTATAGGGG  
CCCATGTACGATTTAATTATGCGGACGTGATGAGCGAAGTACGATCCACGACCGAGGCCGTTTTAAA  
CCCGCTGATCAGCCTCGACTGTGCCTTCTAGTTGCCAGCCATCTGTTGTTTGCCCTCCCCCGTGCCT  
TCCTTGACCCTGGAAGGTGCCACTCCACTGTCTTTTCTTAATAAAATGAGGAAATTGCATCGCATTG  
TCTGAGTAGGTGTCAATTCTATTCTGGGGGGTGGGGTGGGGCAGGACAGCAAGGGGGAGGATTGGGAAG  
ACAATAGCAGGCATGCTGGGGATGCGGTGGGCTCTATGGCTTCTGAGGCGGAAAGAACCAGCTGGGGC  
TCTAGGGGGTATCCCCACGCGCCCTGTAGCGGCGCATTAAAGCGCGGCGGGTGTGGTGGTTACGCGCAG  
CGTGACCGCTACACTTGCCAGCGCCCTAGCGCCCGCTCCTTTTCGCTTTCTTCCCTTCTTCTCGCCA  
CGTTCGCCGGTTCGATGTACGGGCCAGATATACGCGTTGACATTGATTATTGACTAGTTATTAATAGTA  
ATCAATTACGGGGTCATTAGTTCATAGCCCATATATGGAGTCCGCGTTACATAACTTACGGTAAATG  
GCCCCCTGGCTGACCGCCCAACGACCCCCGCCATTGACGTCAATAATGACGTATGTTCCCATAGTA  
ACGCCAATAGGGACTTTCCATTGACGTCAATGGGTGGAGTATTTACGGTAAACTGCCCACTTGGCAGT  
ACATCAAGTGTATCATATGCCAAGTACGCCCCCTATTGACGTCAATGACGGTAAATGGCCCGCCTGGC



ATTATGCCAGTACATGACCTTATGGGACTTTCCTACTTGGCAGTACATCTACGTATTAGTCATCGCT  
ATTACCATGGTGTATGCGGTTTTGGCAGTACATCAATGGGCGTGGATAGCGGTTTTGACTCACGGGGATT  
TCCAAGTCTCCACCCATTGACGTCAATGGGAGTTTTGTTTTGGCACCAAAATCAACGGGACTTTCCAA  
AATGTCGTAACAACCTCCGCCCATTTGACGCAAAATGGGCGGTAGGCGTGTACGGTGGGAGGTCTATATA  
AGCAGAGCTCTCCCTATCAGTGATAGAGATCTCCCTATCAGTGATAGAGAGCGTGCATAGGGAACATC  
CACCACTTTAGTGAATTGTAGCACGGCTTCAGAAGCGGCCGCCACCATGGACAAAGACTGCGAAATG  
AAGCGCACCACCCTGGATAGCCCTCTGGGCAAGCTGGAAGTGTCTGGGTGCGAACAGGGCCTGCACCG  
TATCATCTTCCTGGGCAAAGGAACATCTGCCGCCGACGCCGTGGAAGTGCCTGCCCCAGCCGCCGTGC  
TGGGCGGACCAGAGCCACTGATGCAGGCCACCGCCTGGCTCAACGCCTACTTTCACCAGCCTGAGGCC  
ATCGAGGAGTTCCCTGTGCCAGCCCTGCACCACCCAGTGTTCAGCAGGAGAGCTTTACCCGCCAGGT  
GCTGTGAAACTGCTGAAAGTGGTGAAGTTCGGAGAGGTTCATCAGCTACAGCCACCTGGCCGCCCTGG  
CCGGCAATCCCGCCGCCACCGCCGCCGTGAAAACCGCCCTGAGCGGAAATCCCGTGCCCATTTCTGATC  
CCCTGCCACCGGGTGGTGCAGGGCGACCTGGACGTGGGGGGCTACGAGGGCGGGCTCGCCGTGAAAGA  
GTGGCTGCTGGCCACGAGGGCCACAGACTGGGCAAGCCTGGGCTGGGTCCAGGAGCCGGAGCTAGCG  
GCCAACAGGAATGGCTGCGAGCGATGAAGTTAATCTTATTGAGAGCAGAACAGTGGTTCCCTCTCAAT  
ACATGGGTTTTAATATCCAACCTCAAAGTAGCCTACAATATCCTTCGTGCGCCCTGATGGAACCTTTAA  
CCGACACTTAGCTGAGTATCTAGACCGTAAAGTCACTGCAACGCCAATCCGGTTGATGGGGTTTTCT  
CGTTCGATGTCTTGATTGATCGCAGGATCAATCTTCTAAGCAGAGTCTATAGACCAGCTTATGCAGAT  
CAAGAGCAACCTCCTAGTATTTTAGATCTGGAGAAGCCTGTTGATGGCGACATTGTCCCTGTTATATT  
GTTCTTCCATGGAGGTAGCTTTGCTCATTCTTCTGCAAACAGTGCCATCTACGATACTCTTTGTGCGA  
GGCTTGTGGTTTTGTGCAAGTGTGTTGTTGTCTCTGTGAATTATCGGCGTGCACCAGAGAATCCATAC  
CCTTGTGCTTATGATGATGGTTGGATTGCTCTTAATTGGGTTAACTCCAGATCTTGGCTTAAATCCAA  
GAAAGACTCAAAGGTCCATATTTTCTTGGCTGGTGATAGCTCTGGAGGTAACATCGCGCATAATGTGG  
CTTTAAGAGCGGGTGAATCGGGAATTGATGTTTTGGGGAACATTTCTGCTGAATCCTATGTTTGGTGGG  
AATGAGAGAACGGAGTCTGAGAAAAGTTTTGGATGGGAAATACTTTGTGACGGTTAGAGACCGCGATTG  
GTACTGGAAAGCGTTTTTACCCGAGGGAGAAGATAGAGAGCATCCAGCGTGAATCCGTTTAGCCCGA  
GAGGGAAAAGCTTAGAAGGAGTGAGTTTTCCCAAGAGTCTTGTGGTTGTGCGGGTTTTGGATTTGATT  
AGAGATTGGCAGTTGGCATAACGCGGAAGGGCTCAAGAAAGCGGGTCAAGAGGTTAAGCTTATGCATTT  
AGAGAAAGCAACTGTTGGGTTTTACCTCTTGCCTAATAACAATCATTTCATAATGTTATGGATGAGA  
TTTTCGGCGTTTTGTAAACGCGGAATGTTGAATCGATATTTTTAGATATCGTGTTAGTAGGGTTGCACCG  
ACGCGCATGTGGATTAGTGTGTGCCTTCTAGTTGCCAGCCATCTGTTGTTTGGCCCTCCCCGTGCC  
TTCTTGACCCTGGAAGGTGCCACTCCCACTGTCTTTCTAATAAAAATGAGGAAATTGCATCGCATT  
GTCTGAGTAGGTGTCATTCTATTCTGGGGGGTGGGGTGGGGCAGGACAGCAAGGGGGAGGATTGGGAA  
GACAATAGCAGGCATGCTGGGGATGCGGTGGGCTCTATGG

**Construct II:** CMV-enhancer – CMV promoter – TetO<sub>2</sub> – GAI<sub>1-92</sub> – ADAR1 – P2A – SNAP<sub>f</sub>-tag – GID1A-bGH

GACATTGATTATTGACTAGTTATTAATAGTAATCAATTACGGGGTCATTAGTTCATAGCCCATATATG  
GAGTTCGCGTTACATAACTTACGGTAAATGGCCCGCCTGGCTGACCGCCCAACGACCCCCGCCATT  
GACGTCAATAATGACGTATGTTCCCATAGTAACGCCAATAGGGACTTTCCATTGACGTCAATGGGTGG  
AGTATTTACGGTAAACTGCCCACTTGGCAGTACATCAAGTGTATCATATGCCAAGTACGCCCCCTATT  
GACGTCAATGACGGTAAATGGCCCGCCTGGCATTATGCCCAGTACATGACCTTATGGGACTTTCCTAC  
TTGGCAGTACATCTACGTATTAGTCATCGCTATTACCATGGTGTATGCGGTTTTGGCAGTACATCAATG  
GGCGTGGATAGCGGTTTTGACTCACGGGGATTTCCAAGTCTCCACCCCATTTGACGTCAATGGGAGTTTG  
TTTTGGCACCAAAATCAACGGGACTTTCCAAAATGTCGTAACAACCTCCGCCCATTTGACGCAAAATGGG  
CGGTAGGCGTGTACGGTGGGAGGTCTATATAAGCAGAGCTCTCCCTATCAGTGATAGAGATCTCCCTA  
TCAGTGATAGAGATCGTTCGACGAGCTCGTTTTAGTGAACCGTCAGATCGCCTGGAGACGCCATCCACGC  
TGTTTTGACCTCCATAGAAGACACCGGGACCGATCCAGCCTCCGGACTCTAGCGTTTTAACTTAAAGCT  
TGGTACCGAGCTCGGATCCCCACCATGAAGAGAGATCATCATCATCATCAAGATAAGAAGAC  
TATGATGATGAATGAAGAAGACGACGGTAACGGCATGGATGAGCTTCTAGCTGTTCTTGGTTACAAGG

TTAGGTCATCCGAAATGGCTGATGTTGCTCAGAACTTGAGCAGCTTGAAGTTATGATGTCTAATGTT  
CAAGAAGACGATCTTTCTCAACTCGCTACTGAGACTGTTCACTATAATCCGGCGGAGCTTTACACGTG  
GCTTGATTCTATGCTCACCACCTTAATCCTGCAGGCGGAGGCGGCCAGGGTCTGGCGGCGGCAGTA  
AGGCAGAACGCATGGGTTTACAGAGGTAACCCAGTGACAGGGGCCAGTCTCAGAAGAACTATGCTC  
CTCCTCTCAAGGTCCCCAGAAGCACAGCCAAAGACACTCCCTCTCACTGGCAGCACCTTCCATGACCA  
GATAGCCATGCTGAGCCACCGGTGCTTCAACACTCTGACTAACAGCTTCCAGCCCTCCTTGCTCGGCC  
GCAAGATTCTGGCCGCCATCATTATGAAAAAGACTCTGAGGACATGGGTGTCGTGCTCAGCTTGGGA  
ACAGGGAATCGCTGTGTAAGGAGATTCTCTCAGCCTAAAAGGAGAACTGTCAATGACTGCCATGC  
AGAAATAATCTCCCGGAGAGGCTTCATCAGGTTTCTCTACAGTGAGTTAATGAAATACAACCTCCCAGA  
CTGCGAAGGATAGTATATTTGAACCTGCTAAGGGAGGAGAAAAGCTCCAAATAAAAAAGACTGTGTCA  
TTCCATCTGTATATCAGCACTGCTCCGTGTGGAGATGGCGCCCTCTTTGACAAGTCTGTCAGCGACCG  
TGCTATGGAAAGCACAGAATCCCGCCACTACCTGTCTTCGAGAATCCCAAACAAGGAAAAGCTCCGCA  
CCAAGTGGAGAACGGAGAAGGCACAATCCCTGTGGAATCCAGTGACATTGTGCCTACGTGGGATGGC  
ATTTCGGCTCGGGGAGAGACTCCGTACCATGTCTGTAGTGACAAAATCCTACGCTGGAACGTGCTGGG  
CCTGCAAGGGGCACTGTTGACCCACTTCCCTGCAGCCATTTATCTCAAATCTGTCACATTGGGTTACC  
TTTTTCAGCCAAGGGCATCTGACCCGTGCTATTTGCTGTGCTGTGACAAGAGATGGGAGTGCATTTGAG  
GATGGACTACGACATCCCTTTATTGTCAACCACCCCAAGGTTGGCAGAGTCAGCATATATGATTCCAA  
AAGGCAATCCGGGAAGACTAAGGAGACAAGCGTCAACTGGTGTCTGGCTGATGGCTATGACCTGGAGA  
TCCTGGACGGTACCAGAGGCACTGTGGATGGGCCACGGAATGAATTGTCCCGGTCTCCAAAAGAAC  
ATTTTTCTTCTATTTAAGAAGCTCTGCTCCTTCCGTTACCGCAGGGATCTACTGAGACTCTCCTATGG  
TGAGGCCAAGAAAAGCTGCCCGTACTACGAGACGGCCAAGAACTACTTCAAAAAAGGCCTGAAGGATA  
TGGGCTATGGGAACTGGATTAGCAAACCCAGGAGGAAAAGAACTTTTATCTCTGCCCAGTAGGCGGC  
CGCGGAAGCGGAGCTACTAACTTCAGCCTGCTGAAGCAGGCTGGAGACGTGGAGGAGAACCCTGGACC  
TCTCGAGATGGACAAAGACTGCGAAAATGAAGCGCACCACCTGGATAGCCCTCTGGGCAAGCTGGAAC  
TGTCTGGGTGCGAACAGGGCCTGCACCGTATCATCTTCCCTGGGCAAAGGAACATCTGCCGCCGACGCC  
GTGGAAGTGCCTGCCCCAGCCGCCGTGCTGGGCGGACCAGAGCCACTGATGCAGGCCACCGCCTGGCT  
CAACGCCTACTTTACCAGCCTGAGGCCATCGAGGAGTTCCCTGTGCCAGCCCTGCACCACCCAGTGT  
TCCAGCAGGAGAGCTTTACCCGCCAGGTGCTGTGGAACTGCTGAAAGTGGTGAAGTTCGGAGAGGTC  
ATCAGCTACAGCCACCTGGCCGCCCTGGCCGGCAATCCCGCCGCCACCGCCGCCGTGAAAACCGCCCT  
GAGCGGAAATCCCGTGCCATTCTGATCCCTGCCACCGGGTGGTGCAGGGCGACCTGGACGTGGGGG  
GCTACGAGGGCGGGCTCGCCGTGAAAGAGTGGCTGCTGGCCACGAGGGCCACAGACTGGGCAAGCCT  
GGGCTGGGTCCAGGAGCCGGAGCTAGCGGCCAACAGGAATGGCTGCGAGCGATGAAGTTAATCTTAT  
TGAGAGCAGAACAGTGGTTCCTCTCAATACATGGGTTTTAATATCCAACCTCAAAGTAGCCTACAATA  
TCCTTCGTGCCCCGATGGAACCTTTAACCGACACTTAGCTGAGTATCTAGACCGTAAAGTCACTGCA  
AACGCCAATCCGGTTGATGGGGTTTTCTCGTTTCGATGTCTTGATTGATCGCAGGATCAATCTTCTAAG  
CAGAGTCTATAGACCAGCTTATGCAGATCAAGAGCAACCTCCTAGTATTTTAGATCTGGAGAAGCCTG  
TTGATGGCGACATTGTCCTGTTATATTGTTCTTCCATGGAGGTAGCTTTGCTCATTCTTCTGCAAC  
AGTGCCATCTACGATACTCTTTGTCGAGGCTTGTGGTTTTGTGCAAGTGTGTTGTTGCTCTGTGAA  
TTATCGGCGTGCACCAGAGAATCCATACCCTTGTGCTTATGATGATGGTTGGATTGCTCTTAATTGGG  
TTAACTCCAGATCTTGGCTTAAATCCAAGAAAGACTCAAAGGTCCATATTTCTTGGCTGGTGATAGC  
TCTGGAGGTAACATCGCGCATAATGTGGCTTTAAGAGCGGGTGAATCGGGAATTGATGTTTTGGGGAA  
CATTCTGCTGAATCCTATGTTTTGGTGGGAATGAGAGAACGGAGTCTGAGAAAAGTTTGGATGGGAAAT  
ACTTTGTGACGGTTAGAGACCGGATTTGGTACTGGAAAGCGTTTTTTACCCGAGGGAGAAGATAGAGAG  
CATCCAGCGTGTAATCCGTTTAGCCGAGAGGAAAAGCTTAGAAGGAGTGAGTTTCCCCAAGAGTCT  
TGTGGTTGTGCGGGTTTTGGATTTGATTAGAGATTGGCAGTTGGCATAACGCGGAAGGGCTCAAGAAAG  
CGGGTCAAGAGGTTAAGCTTATGCATTTAGAGAAAAGCAACTGTTGGGTTTTACCTCTTGCCATAATAAC  
AATCATTTCCATAATGTTATGGATGAGATTTTCGGCGTTTTGTAAACGCGGAATGTTGATTAATTAAGTT  
TAAACCCGCTGATCAGCCTCGACTGTGCCTTCTAGTTGCCAGCCATCTGTTGTTTTGCCCTCCCCGT  
GCCTTCTTGACCCTGGAAGGTGCCACTCCCCTGCTCTTTCCTAATAAAAATGAGGAAATGCATCGC  
ATTGCTGAGTAGGTGTCATTCTATTTCTGGGGGGTGGGGTGGGGCAGGACAGCAAGGGGGAGGATTGG  
GAAGACAATAGCAGGCATGCTGGGGATGCGGTGGGCTCTATGG

**Construct III:** CMV-enhancer – CMV promoter – TetO<sub>2</sub> – GAI<sub>1-92</sub> – ADAR1Q – bGH – CMV-enhancer – CMV promoter – TetO<sub>2</sub> – SNAP<sub>F</sub>-tag – GID1A – bGH

GACATTGATTATTGACTAGTTATTAATAGTAATCAATTACGGGGTCATTAGTTCATAGCCCATATATG  
GAGTTCGCGTTACATAACTTACGGTAAATGGCCCGCTGGCTGACCGCCCAACGACCCCCGCCATT  
GACGTCAATAATGACGTATGTTCCCATAGTAACGCCAATAGGGACTTTCCATTGACGTCAATGGGTGG  
AGTATTTACGGTAAACTGCCCACTTGGCAGTACATCAAGTGTATCATATGCCAAGTACGCCCCCTATT  
GACGTCAATGACGGTAAATGGCCCGCTGGCATTATGCCCAGTACATGACCTTATGGGACTTTCCTAC  
TTGGCAGTACATCTACGTATTAGTCATCGCTATTACCATGGTGTATGCGGTTTTGGCAGTACATCAATG  
GGCGTGGATAGCGGTTTACTCACGGGGATTTCCAAGTCTCCACCCCATGACGTCAATGGGAGTTTG  
TTTTGGCACCAAAATCAACGGGACTTTCCAAAATGTCGTAACAACCTCCGCCCCATTGACGCAAATGGG  
CGGTAGGCGTGTACGGTGGGAGGTCTATATAAGCAGAGCTCTCCCTATCAGTGATAGAGATCTCCCTA  
TCAGTGATAGAGATCGTCGACGAGCTCGTTTTAGTGAACCGTCAGATCGCCTGGAGACGCCATCCACGC  
TGTTTTGACCTCCATAGAAGACACCGGGACCGATCCAGCCTCCGGACTCTAGCGTTTTAACTTAAGCT  
TGGTACCGAGCTCGGATCCCCACCATGAAGAGAGATCATCATCATCATCATCAAGATAAGAAGAC  
TATGATGATGAATGAAGAAGACGACGGTAACGGCATGGATGAGCTTCTAGCTGTTCTTGTTACAAGG  
TTAGGTCATCCGAAATGGCTGATGTTGCTCAGAACTTGAGCAGCTTGAAGTTATGATGTCTAATGTT  
CAAGAAGACGATCTTCTCAACTCGTACTGAGACTGTTCACTATAATCCGGCGGAGCTTTACACGTG  
GCTTGATTCTATGCTCACCGACCTTAATCCTGCAGGCGGAGGCGCGCCAGGGTCTGGCGGCGGCAGTA  
AGGCAGAACGCATGGGTTTTACAGAGGTAACCCAGTGACAGGGGCCAGTCTCAGAAGAACTATGCTC  
CTCCTCTCAAGGTCCCAGAAGCACAGCCAAAGACACTCCCTCTCACTGGCAGCACCTTCCATGACCA  
GATAGCCATGCTGAGCCACCGGTGCTTCAACACTCTGACTAACAGCTTCCAGCCCTCCTTGCTCGGCC  
GCAAGATTCTGGCCGCCATCATTATGAAAAAAGACTCTGAGGACATGGGTGTCGTCGTCAGCTTGGGA  
ACAGGGAATCGCTGTGTAAGGAGATTCTCTCAGCCTAAAAGGAGAAACTGTCAATGACTGCCATGC  
AGAAATAATCTCCCGGAGAGGCTTCATCAGGTTTTCTCTACAGTGAGTTAATGAAATACAACCTCCAGA  
CTGCGAAGGATAGTATATTTGAACCTGCTAAGGGAGGAGAAAAGCTCCAAATAAAAAAGACTGTGTCA  
TTCCATCTGTATATCAGCACTGCTCCGTGTGGAGATGGCGCCCTCTTTGACAAGTCTGCAGCGACCG  
TGCTATGGAAAGCACAGAATCCCGCCACTACCTGTCTTCGAGAATCCCAAACAAGGAAAGCTCCGCA  
CCAAGTGGAGAACGGACAAGGCACAATCCCTGTGGAATCCAGTGACATTGTGCCTACGTGGGATGGC  
ATTTCGGCTCGGGGAGAGACTCCGTACCATGTCTGTAGTGACAAAATCCTACGCTGGAACGTGCTGGG  
CCTGCAAGGGGCACTGTTGACCCACTTCTGCAGCCATTTATCTCAAATCTGTACATTGGGTTACC  
TTTTTCAGCCAAGGGCATCTGACCCGTGCTATTTGCTGTGTCGTCGTCGTCGTCGTCGTCGTCGTCGTC  
GATGGACTACGACATCCCTTTATTGTCAACCACCCCAAGGTTGGCAGAGTCAGCATATATGATTCCAA  
AAGGCAATCCGGGAAGACTAAGGAGACAAGCGTCAACTGGTGTCTGGCTGATGGCTATGACCTGGAGA  
TCCTGGACGGTACCAGAGGCACTGTGGATGGGCCACGGAATGAATTGTCCCGGGTCTCCAAAAAGAAC  
ATTTTTCTTCTATTTAAGAAGCTCTGCTCCTTCCGTTACCGCAGGGATCTACTGAGACTCTCCTATGG  
TGAGGCCAAGAAAGCTGCCCGTACTACGAGACGGCCAAGAATACTTCAAAAAAGGCCTGAAGGATA  
TGGGCTATGGGAACTGGATTAGCAAACCCAGGAGGAAAAGAATTTTATCTCTGCCCAGTATGAGGG  
CCCATGTACGATTTAATTATGCGGACGTGATGAGCGAAGTACGATCCACGACCGAGGCCGTTTAA  
CCCGCTGATCAGCCTCGACTGTGCCTTCTAGTTGCCAGCCATCTGTTGTTTGCCCTCCCCCGTGCCT  
TCCTTGACCCTGGAAGGTGCCACTCCCACTGTCCTTTTCTAATAAAATGAGGAAATGCATCGCATTG  
TCTGAGTAGGTGTCATTCTATTCTGGGGGTGGGGTGGGGCAGGACAGCAAGGGGGAGGATTGGGAAG  
ACAATAGCAGGCATGCTGGGGATGCGGTGGGCTCTATGGCTTCTGAGGCGGAAAGAACCAGCTGGGGC  
TCTAGGGGGTATCCCCACGCGCCCTGTAGCGGCGCATTAAAGCGCGGCGGGTGTGGTGGTTACGCGCAG  
CGTGACCGCTACACTTGCCAGCGCCCTAGCGCCGCTCCTTTGCTTTTCTTCCCTTCTTCTCGCCA  
CGTTCGCCGGTCGATGTACGGGCCAGATATACGCGTTGACATTGATTATTGACTAGTTATTAATAGTA  
ATCAATTACGGGGTCATTAGTTCATAGCCCATATATGGAGTCCGCGTTACATAACTTACGGTAAATG  
GCCCGCTGGCTGACCGCCCAACGACCCCCGCCATTGACGTCAATAATGACGTATGTTCCCATAGTA  
ACGCCAATAGGGACTTTCCATTGACGTCAATGGGTGGAGTATTTACGGTAAACTGCCCACTTGGCAGT  
ACATCAAGTGTATCATATGCCAAGTACGCCCCCTATTGACGTCAATGACGGTAAATGGCCCGCTGGC  
ATTATGCCCAGTACATGACCTTATGGGACTTTCCTACTTGGCAGTACATCTACGTATTAGTCATCGCT  
ATTACCATGGTGTATGCGGTTTTGGCAGTACATCAATGGGCGTGGATAGCGGTTTACTCACGGGGATT  
TCCAAGTCTCCACCCCATGACGTCAATGGGAGTTTGTTTTTGGCACCAAAATCAACGGGACTTTCCAA

AATGTCGTAACAACCTCCGCCCCATTGACGCAAATGGGCGGTAGGCGTGTACGGTGGGAGGTCTATATA  
AGCAGAGCTCTCCCTATCAGTGATAGAGATCTCCCTATCAGTGATAGAGAGCGTGCATAGGGAACATC  
CACCACCTTAGTGAATTGTAGCACGGCTTCAGAAGCGGCCGCCACCATGGACAAAGACTGCGAAATG  
AAGCGCACCCACCTGGATAGCCCTCTGGGCAAGCTGGAAGTGTCTGGGTGCGAACAGGGCCTGCACCG  
TATCATCTTCCCTGGGCAAAGGAACATCTGCCGCCGACGCCGTGGAAGTGCCTGCCCCAGCCGCCGTGC  
TGGGCGGACCAGAGCCACTGATGCAGGCCACCGCCTGGCTCAACGCCTACTTTCACCAGCCTGAGGCC  
ATCGAGGAGTTCCCTGTGCCAGCCCTGCACCACCCAGTGTTCAGCAGGAGAGCTTTACCCGCCAGGT  
GCTGTGAAAAGTGTGAAAGTGGTGAAGTTCCGAGAGGTCATCAGCTACAGCCACCTGGCCGCCCTGG  
CCGGCAATCCCGCCGCCACCGCCGCCGTGAAAACCGCCCTGAGCGGAAATCCCCTGCCCATTTCTGATC  
CCCTGCCACCGGGTGGTGCAGGGCGACCTGGACGTGGGGGGCTACGAGGGCGGGCTCGCCGTGAAAGA  
GTGGCTGCTGGCCACGAGGGCCACAGACTGGGCAAGCCTGGGCTGGGTCCAGGAGCCGGAGCTAGCG  
GCCAACAGGAATGGCTGCGAGCGATGAAGTTAATCTTATTGAGAGCAGAACAGTGGTTCCCTCTCAAT  
ACATGGGTTTTAATATCCAACCTCAAAGTAGCCTACAATATCCTTCGTGCCCCTGATGGAACCTTTAA  
CCGACACTTAGCTGAGTATCTAGACCGTAAAGTCACTGCAAACGCCAATCCGTTTATGAGGGTTTTCT  
CGTTCGATGTCTTGATTGATCGCAGGATCAATCTTCTAAGCAGAGTCTATAGACCAGCTTATGCAGAT  
CAAGAGCAACCTCCTAGTATTTTAGATCTGGAGAAGCCTGTTGATGGCGACATTTGCCCTGTTATATT  
GTTCTTCCATGGAGGTAGCTTTGCTCATTCTTCTGCAAACAGTGCCATCTACGATACTCTTTGTGCGCA  
GGCTTGTGGTTTTGTGCAAGTGTGTTGTTGTCTCTGTGAATTATCGGCGTGCACCAGAGAATCCATAC  
CCTTGTGCTTATGATGATGGTTGGATTGCTCTTAATTGGGTTAACTCCAGATCTTGGCTTAAATCCAA  
GAAAGACTCAAAGGTCCATATTTTCTTGGCTGGTGATAGCTCTGGAGGTAACATCGCGCATAATGTGG  
CTTTAAGAGCGGGTGAATCGGGAATTGATGTTTTGGGGAACATTTCTGCTGAATCCTATGTTTGGTGGG  
AATGAGAGAACGGAGTCTGAGAAAAGTTTTGGATGGGAAATACTTTGTGACGGTTAGAGACCGCGATTG  
GTACTGGAAAGCGTTTTTACCCGAGGGAGAAGATAGAGAGCATCCAGCGTGAATCCGTTTAGCCCGA  
GAGGGAAAAGCTTAGAAGGAGTGAGTTTTCCCAAGAGTCTTGTGGTTGTGCGGGTTTTGGATTTGATT  
AGAGATTGGCAGTTGGCATAACGCGGAAGGGCTCAAGAAAGCGGGTCAAGAGGTTAAGCTTATGCATTT  
AGAGAAAGCAACTGTTGGGTTTTACCTCTTGCCTAATAACAATCATTTCCATAATGTTATGGATGAGA  
TTTTCGGCGTTTTGTAAACGCGGAATGTTGAATCGATATTTTCAGATATCGTGTTAGTAGGGTGCACCG  
ACGCGCATGTGGATTAGTGCTGTGCCTTCTAGTTGCCAGCCATCTGTTGTTTGGCCCTCCCCCGTGCC  
TTCCCTGACCCTGGAAGGTGCCACTCCCACTGTCTTTCTAATAAAAATGAGGAAATTGCATCGCATT  
GTCTGAGTAGGTGTCATTCTATTCTGGGGGGTGGGGTGGGGCAGGACAGCAAGGGGGAGGATTGGGAA  
GACAATAGCAGGCATGCTGGGGATGCGGTGGGCTCTATGG

**Construct IV: CMV-enhancer – CMV promoter – TetO<sub>2</sub> – Gal<sub>1-92</sub> – ADAR1Q – P2A – SNAP<sub>f</sub>-tag – GID1A–bGH**

GACATTGATTATTGACTAGTTATTAATAGTAATCAATTACGGGGTCATTAGTTCATAGCCCATATATG  
GAGTTCGCGTTACATAACTTACGGTAAATGGCCCGCCTGGCTGACCGCCCAACGACCCCCGCCATT  
GACGTCAATAATGACGTATGTTCCCATAGTAACGCCAATAGGGACTTTCCATTGACGTCAATGGGTGG  
AGTATTTACGGTAAACTGCCCACTTGGCAGTACATCAAGTGTATCATATGCCAAGTACGCCCCCTATT  
GACGTCAATGACGGTAAATGGCCCGCCTGGCATTATGCCCAGTACATGACCTTATGGGACTTTCCCTAC  
TTGGCAGTACATCTACGTATTAGTCATCGCTATTACCATGGTGTATGCGGTTTTGGCAGTACATCAATG  
GGCGTGGATAGCGGTTTTGACTCACGGGGATTTCCAAGTCTCCACCCCATGACGTCAATGGGAGTTTG  
TTTTGGCACCAAAATCAACGGGACTTTCCAAAATGTCGTAACAACCTCCGCCCCATTGACGCAAATGGG  
CGGTAGGCGTGTACGGTGGGAGGTCTATATAAGCAGAGCTCTCCCTATCAGTGATAGAGATCTCCCTA  
TCAGTGATAGAGATCGTGCAGGAGCTCGTTTTAGTGAACCGTCAGATCGCCTGGAGACGCCATCCACGC  
TGTTTTGACCTCCATAGAAGACACCGGGACCGATCCAGCCTCCGGACTCTAGCGTTTTAACTTAAAGCT  
TGGTACCGAGCTCGGATCCCCACCATGAAGAGAGATCATCATCATCATCAAGATAAGAAGAC  
TATGATGATGAATGAAGAAGACGACGGTAACGGCATGGATGAGCTTCTAGCTGTTCTTGGTTACAAGG  
TTAGGTCATCCGAAAATGGCTGATGTTGCTCAGAACTTGAGCAGCTTGAAGTTATGATGTCTAATGTT  
CAAGAAGACGATCTTTCTCAACTCGCTACTGAGACTGTTCACTATAATCCGGCGGAGCTTTACACGTG  
GCTTGATTCTATGCTCACCGACCTTAATCCTGCAGGCGGAGGCGCGCCAGGGTCTGGCGGCGGCAGTA

AGGCAGAACGCATGGGTTTCACAGAGGTAACCCAGTGACAGGGGCCAGTCTCAGAAGAACTATGCTC  
CTCCTCTCAAGGTCCCCAGAAGCACAGCCAAAGACTCCCTCTCACTGGCAGCACCTTCCATGACCA  
GATAGCCATGCTGAGCCACCGGTGCTTCAACACTCTGACTAACAGCTTCCAGCCCTCCTTGCTCGGC  
GCAAGATTCTGGCCGCCATCATTATGAAAAAAGACTCTGAGGACATGGGTGTCGTCGTCAGCTTGGGA  
ACAGGGAATCGCTGTGTAAGGAGATTCTCTCAGCCTAAAAGGAGAAACTGTCAATGACTGCCATGC  
AGAAATAATCTCCCGGAGAGGCTTCATCAGGTTTCTCTACAGTGAGTTAATGAAATACAACCTCCAGA  
CTGCGAAGGATAGTATATTTGAACCTGCTAAGGGAGGAGAAAAGCTCCAAAATAAAAAGACTGTGTCA  
TTCCATCTGTATATCAGCACTGCTCCGTGTGGAGATGGCGCCCTCTTTGACAAGTCTGTCAGCGACCG  
TGCTATGGAAAGCACAGAATCCCGCCACTACCTGTCTTCGAGAATCCCAAACAAGGAAAGCTCCGCA  
CCAAGGTGGAGAACGGACAAGGCACAATCCCTGTGGAATCCAGTGACATTGTGCCTACGTGGGATGGC  
ATTTCGGCTCGGGGAGAGACTCCGTACCATGTCTGTAGTGACAAAATCCTACGCTGGAACGTGCTGGG  
CCTGCAAGGGGCACTGTTGACCCACTTCTGCGAGCCATTTATCTCAAATCTGTCACATTGGGTTACC  
TTTTTCAGCCAAGGGCATCTGACCCGTGCTATTTGCTGTGTCGTCGTGACAAGAGATGGGAGTGCATTTGAG  
GATGGACTACGACATCCCTTTATTGTCAACCACCCCAAGGTTGGCAGAGTCAGCATATATGATTCCAA  
AAGGCAATCCGGGAAGACTAAGGAGACAAGCGTCAACTGGTGTCTGGCTGATGGCTATGACCTGGAGA  
TCCTGGACGGTACCAGAGGCACTGTGGATGGGCCACGGAATGAATTGTCCCGGTCTCCAAAAGAAC  
ATTTTTCTTCTATTTAAGAAGCTCTGCTCCTTCCGTTACCCGAGGGATCTACTGAGACTCTCCTATGG  
TGAGGCCAAGAAAGCTGCCCGTGACTACGAGACGGCCAAGAATACTTCAAAAAGGCCTGAAGGATA  
TGGGCTATGGAACTGGATTAGCAAACCCAGGAGGAAAAGAACTTTTATCTCTGCCAGTAGGCGGC  
CGCGGAAGCGGAGCTACTAACTTACGCTGCTGAAGCAGGCTGGAGACGTGGAGGAGAACCCTGGACC  
TCTCGAGATGGACAAAGACTGCGAAATGAAGCGCACCACCTGGATAGCCCTCTGGGCAAGCTGGAAC  
TGCTGGGTGCGAACAGGGCCTGCACCGTATCATCTTCTGGGCAAAGGAACATCTGCCGCCGACGCC  
GTGGAAGTGCCTGCCCCAGCCGCGTGCTGGGCGGACCAGAGCCACTGATGCAGGCCACCGCCTGGCT  
CAACGCCTACTTTACCAGCCTGAGGCCATCGAGGAGTTCCCTGTGCCAGCCCTGCACCACCCAGTGT  
TCCAGCAGGAGAGCTTTACCCGCCAGGTGCTGTGGAACTGCTGAAAGTGGTGAAGTTCGGAGAGGTC  
ATCAGCTACAGCCACCTGGCCGCCCTGGCCGGCAATCCCGCCGCCACCGCCCGCTGAAAACCGCCCT  
GAGCGGAAATCCCGTGCCATTCTGATCCCTGCCACCGGGTGGTGCAGGGCGACCTGGACGTGGGGG  
GCTACGAGGGCGGGCTCGCCGTGAAAGAGTGGCTGCTGGCCACGAGGGCCACAGACTGGGCAAGCCT  
GGGCTGGGTCCAGGAGCCGAGCTAGCGGCCAACAGGAATGGCTGCGAGCGATGAAGTTAATCTTAT  
TGAGAGCAGAACAGTGGTTTCTCTCAATACATGGGTTTTAATATCCAACCTCAAAGTAGCCTACAATA  
TCCTTCGTCGCCCTGATGGAACCTTTAACCGACACTTAGCTGAGTATCTAGACCGTAAAGTCACTGCA  
AACGCCAATCCGGTTGATGGGGTTTTCTCGTTTCGATGTCTTGATTGATCGCAGGATCAATCTTCTAAG  
CAGAGTCTATAGACCAGCTTATGCAGATCAAGAGCAACCTCCTAGTATTTTAGATCTGGAGAAGCCTG  
TTGATGGCGACATTGTCCTGTTATATTGTTCTTCCATGGAGGTAGCTTTGCTCATTCTTCTGCAAC  
AGTGCCATCTACGATACTCTTTGTGCGAGGCTTGTGGTTTTGTGCAAGTGTGTTGTTGCTCTGTGAA  
TTATCGGCGTGACCAGAGAATCCATACCCTTGTGCTTATGATGATGGTTGGATTGCTCTTAATTGGG  
TTAACTCCAGATCTTGGCTTAAATCCAAGAAAGACTCAAAGGTCCATATTTTCTTGGCTGGTGATAGC  
TCTGGAGGTAACATCGCGCATAATGTGGCTTTAAGAGCGGGTGAATCGGGAATTGATGTTTTGGGAA  
CATTCTGCTGAATCCTATGTTTTGGTGGGAATGAGAGAACGGAGTCTGAGAAAAGTTTGGATGGGAAAT  
ACTTTGTGACGGTTAGAGACCGGATTGGTACTGGAAAGCGTTTTTACCCGAGGGAGAAGATAGAGAG  
CATCCAGCGTGAATCCGTTTAGCCGAGAGGGAAAAGCTTAGAAGGAGTGAGTTTCCCCAAGAGTCT  
TGTGGTTGTGCGGGTTTTGGATTTGATTAGAGATTGGCAGTTGGCATAACCGGAAGGGCTCAAGAAAG  
CGGGTCAAGAGGTTAAGCTTATGCATTTAGAGAAAGCAACTGTTGGGTTTTACCTCTTGCCTAATAAC  
AATCATTTCCATAATGTTATGGATGAGATTTGCGGTTTTGTAAACGCGGAATGTTGATTAATTAAGTT  
TAAACCGCTGATCAGCCTCGACTGTGCCTTCTAGTTGCCAGCCATCTGTTGTTTTGCCCTCCCCCGT  
GCCTTCTTACCCTGGAAGGTGCCACTCCCACTGTCCTTTCTAATAAAAATGAGGAAATGTCATCGC  
ATTGCTGAGTAGGTGTCATTCTATTCTGGGGGTGGGGTGGGGCAGGACAGCAAGGGGGAGGATTGG  
GAAGACAATAGCAGGCATGCTGGGGATGCGGTGGGCTCTATGG
